# Supplementary material for: Natural and Semisynthetic Analogues of Manadoperoxide B Reveal New Structural Requirements for Trypanocidal Activity
Source: MDPI journal article supplement (doi:10.3390/md11093297), 2013-08-28
Supplement: s1 [file s1]

marinedrugs-11-03297-s001.mol
  corina  12171322053D 1   1.00000     0.00000 
CORINA 3.49 0023  12.04.2013
 24 24  0  0  0  0  0  0  0  0999 V2000
   -0.1517   -3.7682   -9.9515 C   0  0  0  0  0  0  0  0  0  0  0  0
    1.2561   -3.3819  -10.4095 C   0  0  0  0  0  0  0  0  0  0  0  0
    2.2692   -3.9363   -9.4413 C   0  0  0  0  0  0  0  0  0  0  0  0
    3.1506   -3.1258   -8.8654 C   0  0  0  0  0  0  0  0  0  0  0  0
    4.0600   -3.6436   -7.8313 C   0  0  0  0  0  0  0  0  0  0  0  0
    4.9414   -2.8332   -7.2554 C   0  0  0  0  0  0  0  0  0  0  0  0
    5.8730   -3.3636   -6.1962 C   0  0  0  0  0  0  0  0  0  0  0  0
    7.3198   -3.0628   -6.5925 C   0  0  0  0  0  0  0  0  0  0  0  0
    8.2656   -3.6014   -5.5171 C   0  0  0  0  0  0  0  0  0  0  0  0
    9.7137   -3.4367   -5.9826 C   0  0  0  0  0  0  0  0  0  0  0  0
   10.5942   -4.0388   -5.0288 O   0  0  0  0  0  0  0  0  0  0  0  0
   10.4177   -5.4938   -4.9032 O   0  0  0  0  0  0  0  0  0  0  0  0
   10.5916   -6.1991   -6.1361 C   0  0  0  0  0  0  0  0  0  0  0  0
    9.6322   -5.6246   -7.1825 C   0  0  0  0  0  0  0  0  0  0  0  0
    9.8969   -4.1244   -7.3387 C   0  0  0  0  0  0  0  0  0  0  0  0
    8.1882   -5.8442   -6.7271 C   0  0  0  0  0  0  0  0  0  0  0  0
   10.2875   -7.6834   -5.9235 C   0  0  0  0  0  0  0  0  0  0  0  0
    3.2187   -1.6761   -9.2714 C   0  0  0  0  0  0  0  0  0  0  0  0
   11.3033   -8.2743   -4.9802 C   0  0  0  0  0  0  0  0  0  0  0  0
   12.1806   -7.5795   -4.5247 O   0  0  0  0  0  0  0  0  0  0  0  0
   11.2336   -9.5725   -4.6461 O   0  0  0  0  0  0  0  0  0  0  0  0
   12.2452  -10.0734   -3.7328 C   0  0  0  0  0  0  0  0  0  0  0  0
   10.0220   -2.0468   -6.1064 O   0  0  0  0  0  0  0  0  0  0  0  0
    9.9720   -1.3283   -4.8722 C   0  0  0  0  0  0  0  0  0  0  0  0
  1  2  1  0      
  2  3  1  0      
  3  4  2  0      
  4  5  1  0      
  5  6  2  0      
  6  7  1  0      
  7  8  1  0      
  8  9  1  0      
 10 11  1  0      
 11 12  1  0      
 12 13  1  0      
 13 14  1  0      
 14 15  1  0      
 15 10  1  0      
 10  9  1  0      
 14 16  1  0      
 13 17  1  0      
  4 18  1  0      
 17 19  1  0      
 19 20  2  0      
 19 21  1  0      
 21 22  1  0      
 10 23  1  0      
 23 24  1  0      
M  STY  1   1 SUP
M  SLB  1   1   1
M  SAL   1  4  19  20  21  22
M  SBL   1  1  19
M  SMT   1 COOCH3
M  SBV   1 19   -6.6716    6.8063
M  STY  1   2 SUP
M  SLB  1   2   2
M  SAL   2  2  23  24
M  SBL   2  1  23
M  SMT   2 OCH3
M  SBV   2 23   -6.6709    7.2188
M  END
$$$$
