# Supplementary material for: Natural and Semisynthetic Analogues of Manadoperoxide B Reveal New Structural Requirements for Trypanocidal Activity
Source: MDPI journal article supplement (doi:10.3390/md11093297), 2013-08-28
Supplement: s2 [file s2]

marinedrugs-11-03297-s001.mol
  ChemDraw11291308482D

 24 24  0  0  0  0  0  0  0  0999 V2000
   -5.1582    0.8662    0.0000 C   0  0  0  0  0  0  0  0  0  0  0  0
   -4.4437    0.4537    0.0000 C   0  0  0  0  0  0  0  0  0  0  0  0
   -3.7292    0.8662    0.0000 C   0  0  0  0  0  0  0  0  0  0  0  0
   -3.0148    0.4537    0.0000 C   0  0  0  0  0  0  0  0  0  0  0  0
   -2.3003    0.8662    0.0000 C   0  0  0  0  0  0  0  0  0  0  0  0
   -1.5858    0.4537    0.0000 C   0  0  0  0  0  0  0  0  0  0  0  0
   -0.8714    0.8662    0.0000 C   0  0  0  0  0  0  0  0  0  0  0  0
   -0.1569    0.4537    0.0000 C   0  0  0  0  0  0  0  0  0  0  0  0
    0.5576    0.8662    0.0000 C   0  0  0  0  0  0  0  0  0  0  0  0
    1.2298    0.4125    0.0000 C   0  0  0  0  0  0  0  0  0  0  0  0
    1.2298   -0.4125    0.0000 O   0  0  0  0  0  0  0  0  0  0  0  0
    1.9442   -0.8250    0.0000 O   0  0  0  0  0  0  0  0  0  0  0  0
    2.6587   -0.4125    0.0000 C   0  0  0  0  0  0  0  0  0  0  0  0
    2.6587    0.4125    0.0000 C   0  0  0  0  0  0  0  0  0  0  0  0
    1.9442    0.8250    0.0000 C   0  0  0  0  0  0  0  0  0  0  0  0
    3.3732    0.8250    0.0000 C   0  0  0  0  0  0  0  0  0  0  0  0
    3.3732   -0.8250    0.0000 C   0  0  0  0  0  0  0  0  0  0  0  0
   -3.0148   -0.3713    0.0000 C   0  0  0  0  0  0  0  0  0  0  0  0
    3.7292   -0.6187    0.0000 C   0  0  0  0  0  0  0  0  0  0  0  0
    3.0148   -1.0313    0.0000 O   0  0  0  0  0  0  0  0  0  0  0  0
    4.4437   -1.0312    0.0000 O   0  0  0  0  0  0  0  0  0  0  0  0
    5.1582   -0.6187    0.0000 C   0  0  0  0  0  0  0  0  0  0  0  0
    1.5865    1.0313    0.0000 O   0  0  0  0  0  0  0  0  0  0  0  0
    2.3009    0.6188    0.0000 C   0  0  0  0  0  0  0  0  0  0  0  0
  1  2  1  0      
  2  3  1  0      
  3  4  2  0      
  4  5  1  0      
  5  6  2  0      
  6  7  1  0      
  7  8  1  0      
  8  9  1  0      
 10 11  1  0      
 11 12  1  0      
 12 13  1  0      
 13 14  1  0      
 14 15  1  0      
 15 10  1  0      
 10  9  1  6      
 14 16  1  6      
 13 17  1  6      
  4 18  1  0      
 17 19  1  0      
 19 20  2  0      
 19 21  1  0      
 21 22  1  0      
 10 23  1  1      
 23 24  1  0      
M  STY  1   1 SUP
M  SLB  1   1   1
M  SAL   1  4  19  20  21  22
M  SBL   1  1  19
M  SMT   1 COOCH3
M  SBV   1 19   -6.6716    6.8063
M  STY  1   2 SUP
M  SLB  1   2   2
M  SAL   2  2  23  24
M  SBL   2  1  23
M  SMT   2 OCH3
M  SBV   2 23   -6.6709    7.2188
M  END
