# Supplementary material for: Natural and Semisynthetic Analogues of Manadoperoxide B Reveal New Structural Requirements for Trypanocidal Activity
Source: MDPI journal article supplement (doi:10.3390/md11093297), 2013-08-28
Supplement: s3 [file s3]

marinedrugs-11-03297-s002.mol
  corina  12171322053D 1   1.00000     0.00000 
CORINA 3.49 0023  12.04.2013
 24 24  0  0  0  0  0  0  0  0999 V2000
   10.2132   -0.1347   -3.6760 C   0  0  0  0  0  0  0  0  0  0  0  0
    9.5543   -0.0797   -2.5234 C   0  0  0  0  0  0  0  0  0  0  0  0
    8.2328   -0.7144   -2.4007 C   0  0  0  0  0  0  0  0  0  0  0  0
    7.5262   -0.5673   -1.2851 C   0  0  0  0  0  0  0  0  0  0  0  0
    6.1725   -1.2174   -1.1593 C   0  0  0  0  0  0  0  0  0  0  0  0
    6.1422   -2.0940    0.0943 C   0  0  0  0  0  0  0  0  0  0  0  0
    4.7678   -2.7541    0.2220 C   0  0  0  0  0  0  0  0  0  0  0  0
    4.7812   -3.7374    1.3940 C   0  0  0  0  0  0  0  0  0  0  0  0
    3.5317   -4.4325    1.4495 O   0  0  0  0  0  0  0  0  0  0  0  0
    3.2762   -5.2764    0.2720 O   0  0  0  0  0  0  0  0  0  0  0  0
    4.2910   -6.2586    0.0419 C   0  0  0  0  0  0  0  0  0  0  0  0
    5.6485   -5.5594   -0.0761 C   0  0  0  0  0  0  0  0  0  0  0  0
    5.9116   -4.7520    1.1982 C   0  0  0  0  0  0  0  0  0  0  0  0
    5.6361   -4.6196   -1.2833 C   0  0  0  0  0  0  0  0  0  0  0  0
    3.9892   -7.0117   -1.2553 C   0  0  0  0  0  0  0  0  0  0  0  0
   10.1608    0.6327   -1.3420 C   0  0  0  0  0  0  0  0  0  0  0  0
    9.6591   -0.9397   -4.8231 C   0  0  0  0  0  0  0  0  0  0  0  0
    9.5488   -0.0509   -6.0636 C   0  0  0  0  0  0  0  0  0  0  0  0
    2.7093   -7.7914   -1.0973 C   0  0  0  0  0  0  0  0  0  0  0  0
    2.1009   -7.7490   -0.0543 O   0  0  0  0  0  0  0  0  0  0  0  0
    2.2451   -8.5328   -2.1154 O   0  0  0  0  0  0  0  0  0  0  0  0
    1.0066   -9.2572   -1.8923 C   0  0  0  0  0  0  0  0  0  0  0  0
    4.9857   -3.0242    2.6153 O   0  0  0  0  0  0  0  0  0  0  0  0
    3.9197   -2.1351    2.9547 C   0  0  0  0  0  0  0  0  0  0  0  0
  1  2  2  0      
  2  3  1  0      
  3  4  2  0      
  4  5  1  0      
  5  6  1  0      
  6  7  1  0      
  8  9  1  0      
  9 10  1  0      
 10 11  1  0      
 11 12  1  0      
 12 13  1  0      
 13  8  1  0      
  8  7  1  0      
 12 14  1  0      
 11 15  1  0      
  2 16  1  0      
  1 17  1  0      
 17 18  1  0      
 15 19  1  0      
 19 20  2  0      
 19 21  1  0      
 21 22  1  0      
  8 23  1  0      
 23 24  1  0      
M  STY  1   1 SUP
M  SLB  1   1   1
M  SAL   1  4  19  20  21  22
M  SBL   1  1  19
M  SMT   1 COOCH3
M  SBV   1 19   -6.8019    6.5794
M  STY  1   2 SUP
M  SLB  1   2   2
M  SAL   2  2  23  24
M  SBL   2  1  23
M  SMT   2 OCH3
M  SBV   2 23   -6.8013    6.9919
M  END
$$$$
