# Supplementary material for: Natural and Semisynthetic Analogues of Manadoperoxide B Reveal New Structural Requirements for Trypanocidal Activity
Source: MDPI journal article supplement (doi:10.3390/md11093297), 2013-08-28
Supplement: s4 [file s4]

marinedrugs-11-03297-s002.mol
  ChemDraw11291308482D

 24 24  0  0  0  0  0  0  0  0999 V2000
   -4.0865    0.3300    0.0000 C   0  0  0  0  0  0  0  0  0  0  0  0
   -3.3720   -0.0825    0.0000 C   0  0  0  0  0  0  0  0  0  0  0  0
   -2.6575    0.3300    0.0000 C   0  0  0  0  0  0  0  0  0  0  0  0
   -1.9431   -0.0825    0.0000 C   0  0  0  0  0  0  0  0  0  0  0  0
   -1.2286    0.3300    0.0000 C   0  0  0  0  0  0  0  0  0  0  0  0
   -0.5141   -0.0825    0.0000 C   0  0  0  0  0  0  0  0  0  0  0  0
    0.2004    0.3300    0.0000 C   0  0  0  0  0  0  0  0  0  0  0  0
    0.8725   -0.1238    0.0000 C   0  0  0  0  0  0  0  0  0  0  0  0
    0.8725   -0.9488    0.0000 O   0  0  0  0  0  0  0  0  0  0  0  0
    1.5870   -1.3613    0.0000 O   0  0  0  0  0  0  0  0  0  0  0  0
    2.3015   -0.9488    0.0000 C   0  0  0  0  0  0  0  0  0  0  0  0
    2.3015   -0.1238    0.0000 C   0  0  0  0  0  0  0  0  0  0  0  0
    1.5870    0.2887    0.0000 C   0  0  0  0  0  0  0  0  0  0  0  0
    3.0159    0.2887    0.0000 C   0  0  0  0  0  0  0  0  0  0  0  0
    3.0159   -1.3613    0.0000 C   0  0  0  0  0  0  0  0  0  0  0  0
   -3.3720   -0.9075    0.0000 C   0  0  0  0  0  0  0  0  0  0  0  0
   -4.0865    1.1550    0.0000 C   0  0  0  0  0  0  0  0  0  0  0  0
   -4.8009    1.5675    0.0000 C   0  0  0  0  0  0  0  0  0  0  0  0
    3.3720   -1.1550    0.0000 C   0  0  0  0  0  0  0  0  0  0  0  0
    2.6575   -1.5675    0.0000 O   0  0  0  0  0  0  0  0  0  0  0  0
    4.0865   -1.5675    0.0000 O   0  0  0  0  0  0  0  0  0  0  0  0
    4.8009   -1.1550    0.0000 C   0  0  0  0  0  0  0  0  0  0  0  0
    1.2292    0.4950    0.0000 O   0  0  0  0  0  0  0  0  0  0  0  0
    1.9437    0.0825    0.0000 C   0  0  0  0  0  0  0  0  0  0  0  0
  1  2  2  0      
  2  3  1  0      
  3  4  2  0      
  4  5  1  0      
  5  6  1  0      
  6  7  1  0      
  8  9  1  0      
  9 10  1  0      
 10 11  1  0      
 11 12  1  0      
 12 13  1  0      
 13  8  1  0      
  8  7  1  6      
 12 14  1  6      
 11 15  1  6      
  2 16  1  0      
  1 17  1  0      
 17 18  1  0      
 15 19  1  0      
 19 20  2  0      
 19 21  1  0      
 21 22  1  0      
  8 23  1  1      
 23 24  1  0      
M  STY  1   1 SUP
M  SLB  1   1   1
M  SAL   1  4  19  20  21  22
M  SBL   1  1  19
M  SMT   1 COOCH3
M  SBV   1 19   -6.8019    6.5794
M  STY  1   2 SUP
M  SLB  1   2   2
M  SAL   2  2  23  24
M  SBL   2  1  23
M  SMT   2 OCH3
M  SBV   2 23   -6.8013    6.9919
M  END
