# Supplementary material for: Natural and Semisynthetic Analogues of Manadoperoxide B Reveal New Structural Requirements for Trypanocidal Activity
Source: MDPI journal article supplement (doi:10.3390/md11093297), 2013-08-28
Supplement: s5 [file s5]

marinedrugs-11-03297-s004.mol
  corina  12171322053D 1   1.00000     0.00000 
CORINA 3.49 0023  12.04.2013
 13 12  0  0  0  0  0  0  0  0999 V2000
   -0.0184    1.5028    0.0103 C   0  0  0  0  0  0  0  0  0  0  0  0
    0.0021   -0.0041    0.0020 C   0  0  0  0  0  0  0  0  0  0  0  0
    1.4513   -0.4944   -0.0145 C   0  0  0  0  0  0  0  0  0  0  0  0
    1.4750   -2.0197    0.1029 C   0  0  0  0  0  0  0  0  0  0  0  0
    2.9234   -2.5004    0.2119 C   0  0  0  0  0  0  0  0  0  0  0  0
    2.9423   -3.9882    0.4504 C   0  0  0  0  0  0  0  0  0  0  0  0
    4.1129   -4.6324    0.5794 O   0  0  0  0  0  0  0  0  0  0  0  0
    1.0197    2.1211    0.0037 O   0  0  0  0  0  0  0  0  0  0  0  0
    1.9039   -4.6013    0.5256 O   0  0  0  0  0  0  0  0  0  0  0  0
    0.8677   -2.5960   -1.0552 O   0  0  0  0  0  0  0  0  0  0  0  0
    2.1173   -0.0733   -1.3260 C   0  0  0  0  0  0  0  0  0  0  0  0
   -1.1898    2.1580    0.0194 O   0  0  0  0  0  0  0  0  0  0  0  0
   -1.1335    3.6089    0.0270 C   0  0  0  0  0  0  0  0  0  0  0  0
  1  2  1  0      
  2  3  1  0      
  3  4  1  0      
  4  5  1  0      
  5  6  1  0      
  6  7  1  0      
  1  8  2  0      
  6  9  2  0      
  4 10  1  0      
  3 11  1  0      
  1 12  1  0      
 12 13  1  0      
M  STY  1   1 SUP
M  SLB  1   1   1
M  SAL   1  2  12  13
M  SBL   1  1  11
M  SMT   1 OCH3
M  SBV   1 11   -7.5936    6.2906
M  END
$$$$
