# Supplementary material for: Natural and Semisynthetic Analogues of Manadoperoxide B Reveal New Structural Requirements for Trypanocidal Activity
Source: MDPI journal article supplement (doi:10.3390/md11093297), 2013-08-28
Supplement: s6 [file s6]

marinedrugs-11-03297-s004.mol
  ChemDraw11291308492D

 13 12  0  0  0  0  0  0  0  0999 V2000
   -1.9642   -0.2062    0.0000 C   0  0  0  0  0  0  0  0  0  0  0  0
   -1.2497    0.2062    0.0000 C   0  0  0  0  0  0  0  0  0  0  0  0
   -0.5353   -0.2062    0.0000 C   0  0  0  0  0  0  0  0  0  0  0  0
    0.1792    0.2062    0.0000 C   0  0  0  0  0  0  0  0  0  0  0  0
    0.8937   -0.2062    0.0000 C   0  0  0  0  0  0  0  0  0  0  0  0
    1.6081    0.2062    0.0000 C   0  0  0  0  0  0  0  0  0  0  0  0
    2.3226   -0.2062    0.0000 O   0  0  0  0  0  0  0  0  0  0  0  0
   -1.9642   -1.0313    0.0000 O   0  0  0  0  0  0  0  0  0  0  0  0
    1.6081    1.0313    0.0000 O   0  0  0  0  0  0  0  0  0  0  0  0
    0.1792    1.0313    0.0000 O   0  0  0  0  0  0  0  0  0  0  0  0
   -0.5353   -1.0313    0.0000 C   0  0  0  0  0  0  0  0  0  0  0  0
   -2.3226    0.4125    0.0000 O   0  0  0  0  0  0  0  0  0  0  0  0
   -1.6081    0.0000    0.0000 C   0  0  0  0  0  0  0  0  0  0  0  0
  1  2  1  0      
  2  3  1  0      
  3  4  1  0      
  4  5  1  0      
  5  6  1  0      
  6  7  1  0      
  1  8  2  0      
  6  9  2  0      
  4 10  1  1      
  3 11  1  1      
  1 12  1  0      
 12 13  1  0      
M  STY  1   1 SUP
M  SLB  1   1   1
M  SAL   1  2  12  13
M  SBL   1  1  11
M  SMT   1 OCH3
M  SBV   1 11   -7.5936    6.2906
M  END
